# Supplementary material
Source: MDPI journal article supplement (https://www.mdpi.com/2073-445X/11/7/1027)
Supplement: s1 [file s1]

**Table S1.** Scores of all parameters

| Indicator             | Description            | Threshold | Score  |       |      |
|-----------------------|------------------------|-----------|--------|-------|------|
| pH                    | Neutral                | 6.6-7.3   | 1.0    |       |      |
|                       | Slightly alkaline      | 7.3-7.8   | 0.8    |       |      |
|                       | Moderately alkaline    | 7.8-8.4   | 0.6    |       |      |
|                       | Strongly alkaline      | 8.4-9     | 0.4    |       |      |
|                       | Very strongly alkaline | >9        | 0.2    |       |      |
| EC (dS/m)             | Non-saline             | <2        | 1.0    |       |      |
|                       | Very slightly saline   | 2-4       | 0.8    |       |      |
|                       | Slightly saline        | 4-8       | 0.6    |       |      |
|                       | Moderately saline      | 8-16      | 0.4    |       |      |
|                       | Strongly saline        | >16       | 0.2    |       |      |
| CaCO <sub>3</sub> (%) | Non-calcareous         | 0         | 0.2    |       |      |
|                       | Slightly calcareous    | 0-2       | 1.0    |       |      |
|                       | Moderately calcareous  | 2-10      | 0.8    |       |      |
|                       | Strongly calcareous    | 10-25     | 0.6    |       |      |
|                       | Extremely calcareous   | >25       | 0.4    |       |      |
| ESP                   | Non-sodic              | <10       | 1.0    |       |      |
|                       | Slightly sodic         | 10-15     | 0.8    |       |      |
|                       | Moderately sodic       | 15-30     | 0.6    |       |      |
|                       | Strongly sodic         | 30-50     | 0.4    |       |      |
|                       | Very strongly sodic    | >50       | 0.2    |       |      |
| CEC                   | Very high              | < 6       | 1.0    |       |      |
|                       | High                   | 6-12      | 0.8    |       |      |
|                       | Moderate               | 12-25     | 0.6    |       |      |
|                       | Low                    | 25-40     | 0.4    |       |      |
|                       | Very low               | >40       | 0.2    |       |      |
| N                     | Very high              | >120      | 1.0    |       |      |
|                       | High                   | 120-100   | 0.8    |       |      |
|                       | Moderate               | 100-75    | 0.6    |       |      |
|                       | Low                    | 75-30     | 0.4    |       |      |
|                       | Very low               | <30       | 0.2    |       |      |
| P                     | Soil texture           | Light     | Medium | Heavy |      |
|                       | Very high              | >15       | >8     | >5    | 1    |
|                       | High                   | 15-10     | 8-5    | 5-3   | 0.75 |
|                       | Medium                 | 10-5      | 5-3    | 3-2   | 0.50 |
|                       | Low                    | <5        | <3     | <2    | 0.25 |
| K                     | Very high              | >180      |        |       | 1.00 |
|                       | High                   | 180-120   |        |       | 0.75 |
|                       | Medium                 | 120-60    |        |       | 0.50 |
|                       | Low                    | <60       |        |       | 0.25 |
| OM                    | Very high              | >2        |        |       | 1.00 |
|                       | High                   | 2-1       |        |       | 0.75 |
|                       | Medium                 | 1-0.5     |        |       | 0.50 |
|                       | Low                    | <0.5      |        |       | 0.25 |
| Depth                 | Very deep              | >150      |        |       | 1.0  |
|                       | Deep                   | 150-100   |        |       | 0.8  |
|                       | Moderately deep        | 100-50    |        |       | 0.6  |
|                       | Shallow                | 50-30     |        |       | 0.4  |
|                       | Very shallow           | <30       |        |       | 0.2  |
| IWQI                  | High suitability       | >37       |        |       | 1.00 |
|                       | Medium suitability     | 37-22     |        |       | 0.66 |
|                       | Low suitability        | <22       |        |       | 0.33 |

<sup>1</sup>Soil science division (2017); <sup>2</sup>Yao et al. (2013); <sup>3</sup>FAO (2006); <sup>4</sup>FAO (1988); <sup>5</sup>Hazelton and Murphy (2016); <sup>6</sup>Soltanpour (1991); <sup>7</sup>Mohamed et al. (2020); <sup>8</sup>Simsek and Gunduz (2007) and El Behairy et al. (2021).

**Table S2.** Final SC range of study area

| Index    | Values      | Symbol | Classes                 |
|----------|-------------|--------|-------------------------|
| Final SC | $\geq 0.71$ | C1     | Highly capable          |
|          | 0.65 – 0.70 | C2     | Moderately high capable |
|          | 0.59 – 0.64 | C3     | Moderate capable        |
|          | $\leq 0.58$ | C4     | Low capable             |

**Table S3.** Statistical characterization of the weighted mean of the studied soil profiles properties (n= 61)

| Soil Property         | Statistical parameters                                 |        |        |          |       |          |          |
|-----------------------|--------------------------------------------------------|--------|--------|----------|-------|----------|----------|
|                       | Min.                                                   | Max.   | Mean   | St. Dev. | C.V.  | Skewness | Kurtosis |
| Depth (cm)            | 80.00                                                  | 150.00 | 128.67 | 26.42    | 21.00 | -0.80    | -0.76    |
| EC (dS/m)             | 0.64                                                   | 19.64  | 5.45   | 5.31     | 97.48 | 1.89     | 3.83     |
| pH                    | 8.08                                                   | 8.86   | 8.49   | 0.25     | 2.93  | -4.03    | 16.46    |
| ESP                   | 3.22                                                   | 24.94  | 11.27  | 6.06     | 53.80 | 0.77     | 0.46     |
| CaCO <sub>3</sub> (%) | 0.75                                                   | 9.04   | 3.90   | 2.03     | 51.89 | 0.95     | 2.34     |
| AN (ppm)              | 7.50                                                   | 81.00  | 48.34  | 24.53    | 50.74 | -0.38    | -1.12    |
| AP (ppm)              | 6.30                                                   | 22.30  | 14.97  | 5.10     | 34.03 | -0.25    | -1.11    |
| AK (ppm)              | 9.30                                                   | 457.10 | 277.00 | 173.91   | 62.78 | -0.71    | -1.04    |
| CEC (cmolc/kg)        | 5.82                                                   | 42.24  | 29.80  | 13.74    | 46.12 | -0.99    | -0.66    |
| OM (%)                | 0.24                                                   | 1.22   | 0.82   | 0.33     | 39.89 | -0.59    | -0.81    |
| IWQI                  | 26.50                                                  | 37.80  | 33.42  | 3.87     | 11.57 | -2.82    | 9.62     |
| Texture class         | Clay, Silty Clay, Silty Clay Loam, Sand and Sandy Loam |        |        |          |       |          |          |

n = number of soil samples; Min = Minimum; Max = Maximum; SD = standard deviation; CV = coefficient of variation; EC= electrical conductivity; ESP = exchangeable sodium percentage; AN = available nitrogen; AP = available phosphorous; AK = available potassium; CEC = cation exchange capacity; OM = organic matter; IWQI = irrigation water quality index

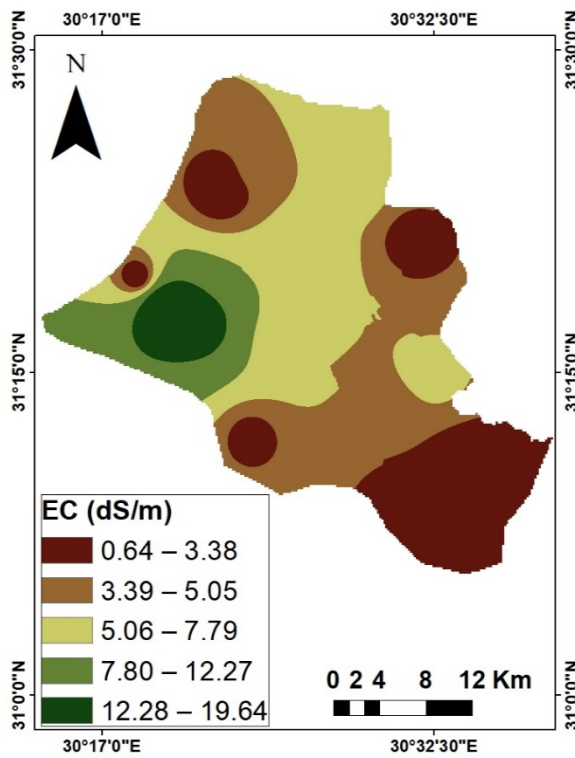

(a)

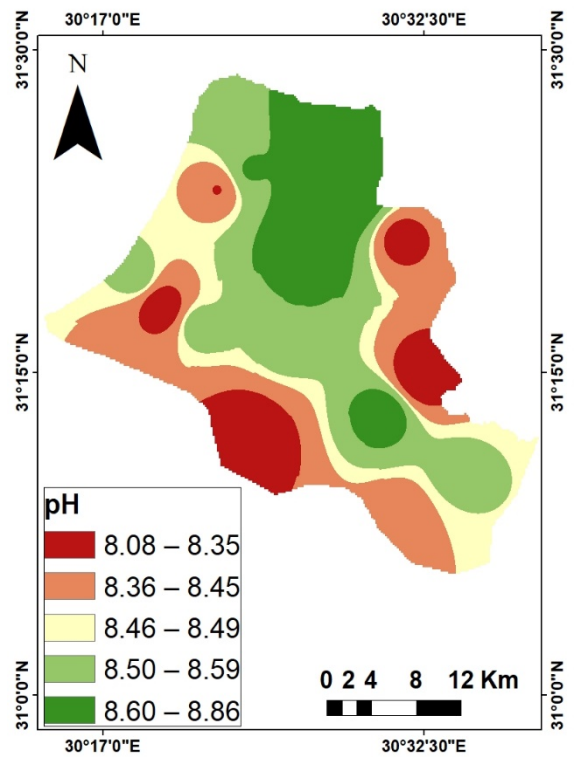

(b)

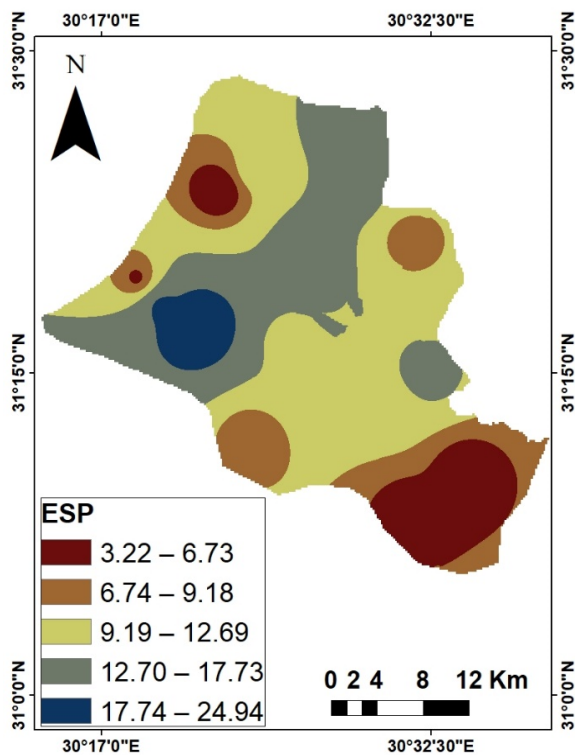

(c)

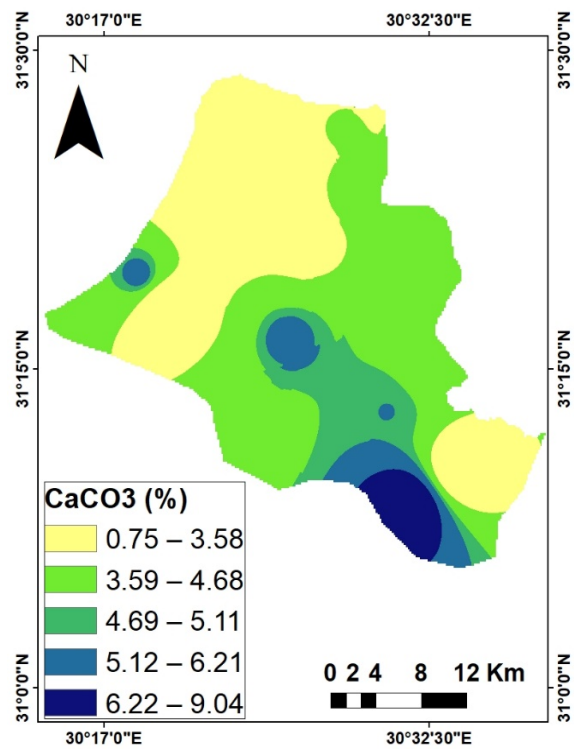

(d)

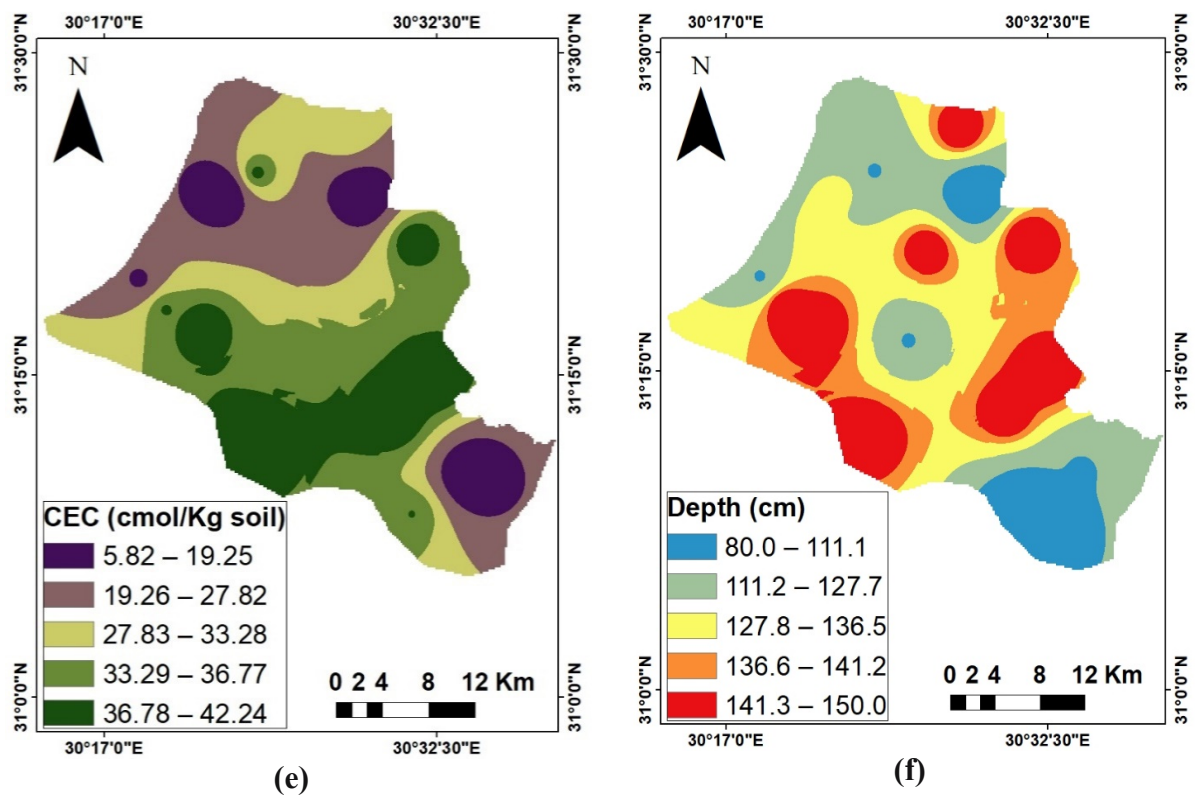

**Figure S1.** Spatial distribution of some chemical and physical soil properties (a) electric conductivity (EC: dS/m), (b) soil reaction (pH), (c) exchangeable sodium percent (ESP), (d) calcium carbonate percentage ( $\text{CaCO}_3$ : %), (e) cation exchange capacity (CEC: cmolc/Kg) and (f) depth (cm)

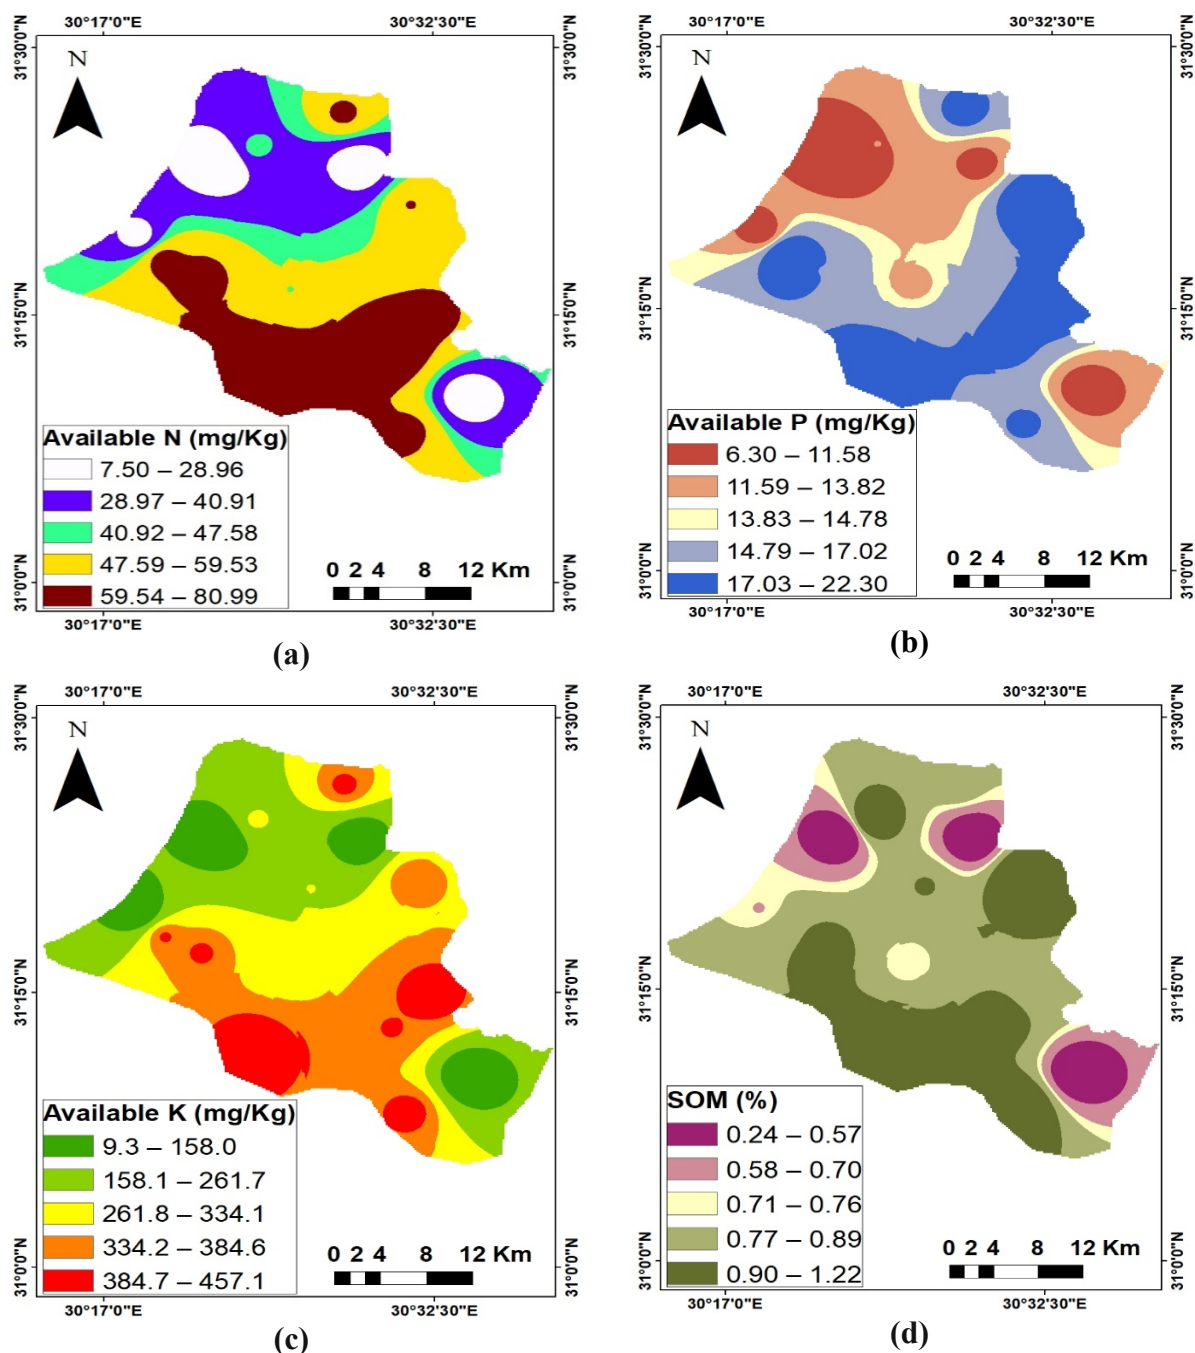

**Figure S2.** Spatial distribution of some fertility soil properties (a) (Available N: mg/kg), (b) (Available P: mg/kg), (c) (Available K: mg/kg), (d) Soil Organic Matter (SOM %)



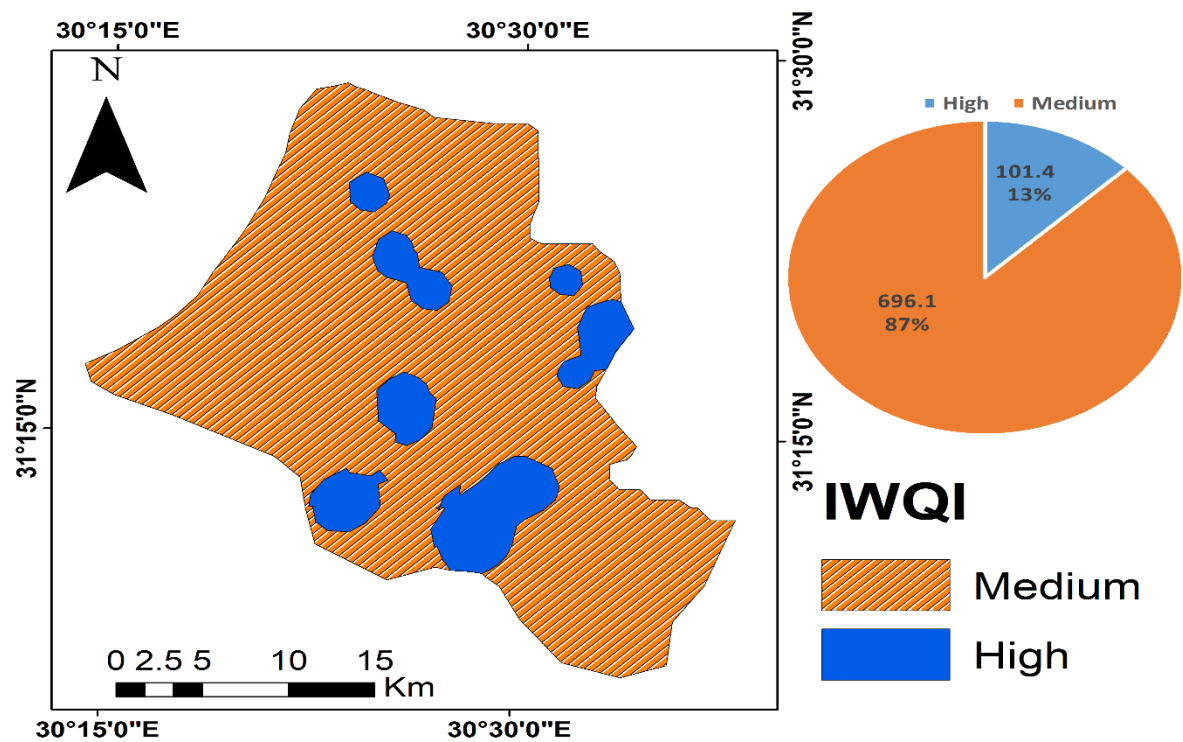

**Figure S3.** The IWQ index map of the study area

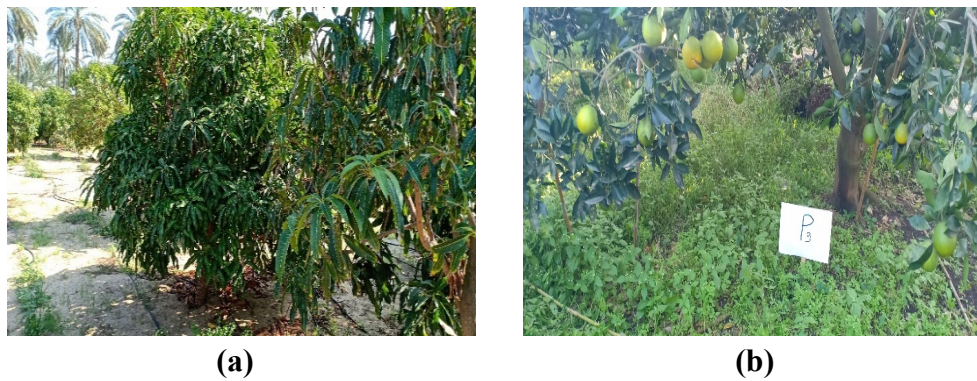

**Figure S4.** The cultivated orchards (a) Mango and (b) Orange growth in the study area

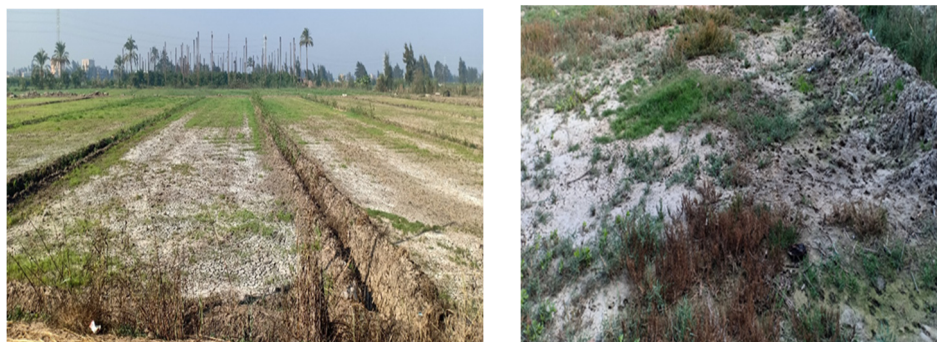

**Figure S5.** The saline soils near the fish bonds in the southern of Idku lake in the studied area

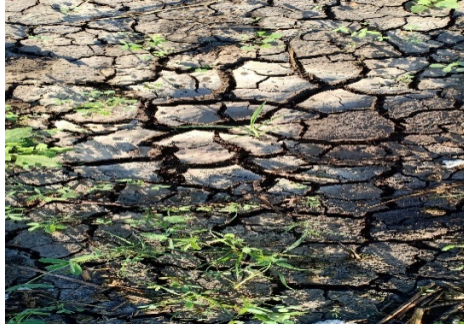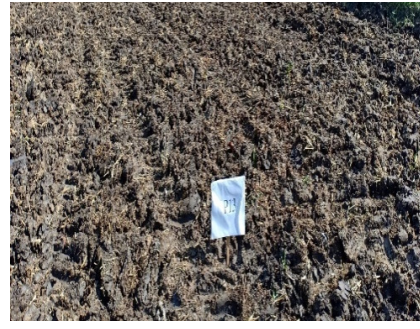

**Figure.S6.** Very poorly drained soil in the study area
